# Supplementary material for: Analyses of six homologous proteins of Protochlamydia amoebophila UWE25 encoded by large GC-rich genes (lgr): a model of evolution and concatenation of leucine-rich repeats
Source: PubMed Central journal article supplement (PMC2216083; doi:10.1186/1471-2148-7-231), 2007-11-16
Supplement: 1471-2148-7-231-S1.pdf [file 1471-2148-7-231-S1.pdf]

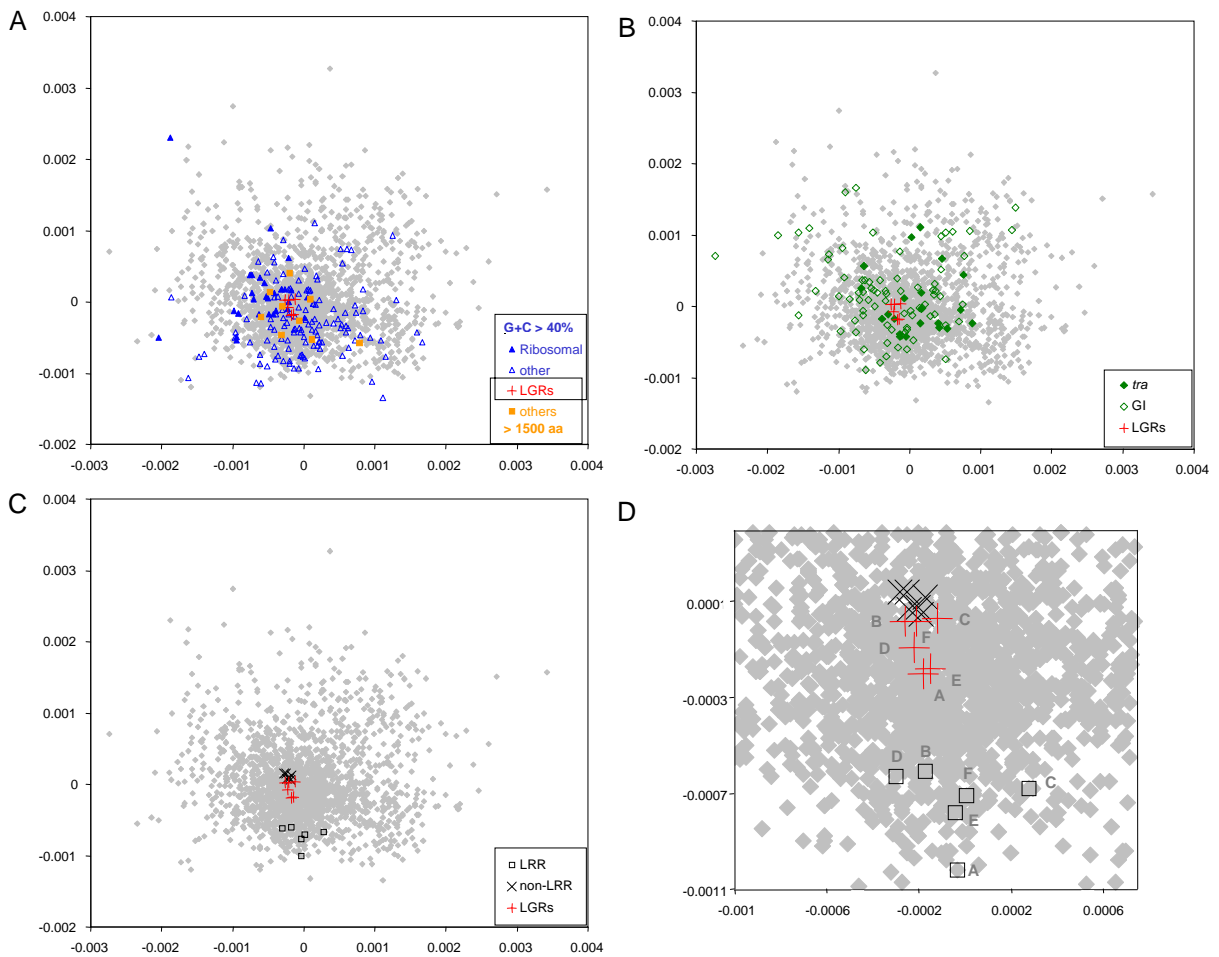

### Additional file 1.

Principal component analysis (PCA) of the codon usage of the 2031 ORFs of *P. amoebophila* performed on Euclidean distances. The *lgrs*, the ORFs exhibiting a G+C content higher than 40% (G+C > 40%), the ribosomal genes (ribosomal), the genes encoding proteins larger than 1500 residues (> 1500 aa) (A); all genes belonging to the Pam100G genomic island (GI) and to the *tra* operon (*tra*) (B). The LRR domain (LRR) and the remaining part of the *lgrs* (non-LRR) (C) are independently highlighted. Panel D is an higher magnification of panel C. The protein genes presenting a common codon usage in *P. amoebophila* would be found around the coordinates (0,0). In this particular analysis, no particular codon usage could be assigned to the *lgrs*.
